# Supplementary material for: Molecular, Cellular, and Developmental Organization of the Mouse Vomeronasal organ at Single Cell Resolution
Source: PubMed Central journal article supplement — bioRxiv. 2024 Sep 5:2024.02.22.581574. Preprint. [Version 3] doi: 10.1101/2024.02.22.581574 (PMC11383295; doi:10.1101/2024.02.22.581574), 2024-09-05
Supplement: media-1.pdf [file media-1.pdf]

**Supplemental Figures:**

**A**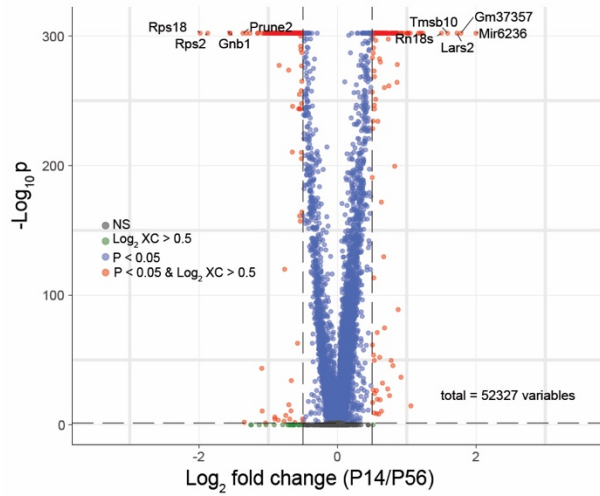**B**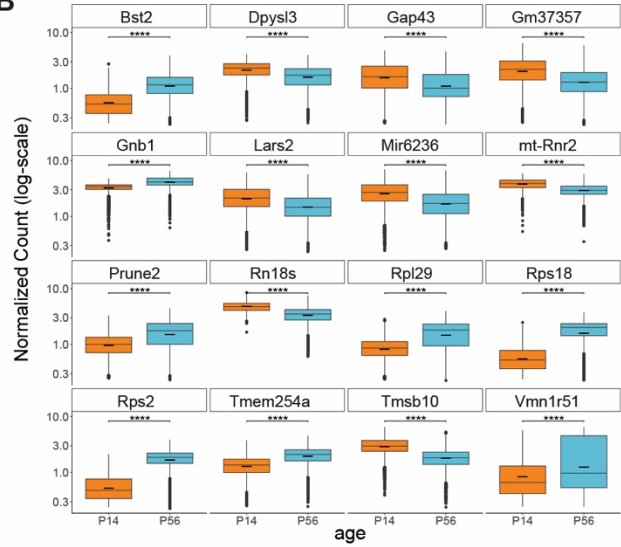**C**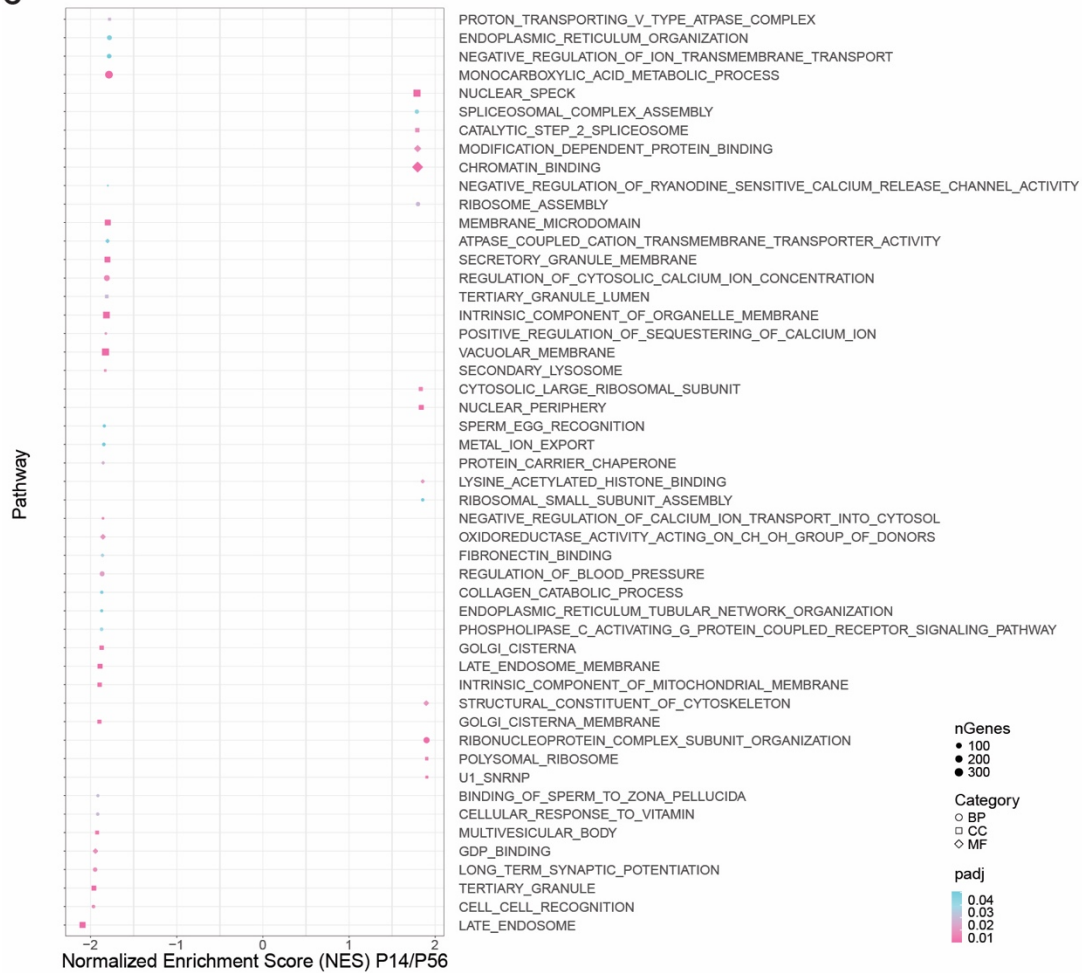

Fig. S1. Age differences in gene expression.

**A** Volcano plot of gene expression differences between P14 and P56. **B**. 16 significantly differentially expressed genes with largest positive or negative  $\log_2$ -fold-change values. **C**. 50 significantly enriched GO terms with largest positive or negative  $\log_2$ -fold-change values.

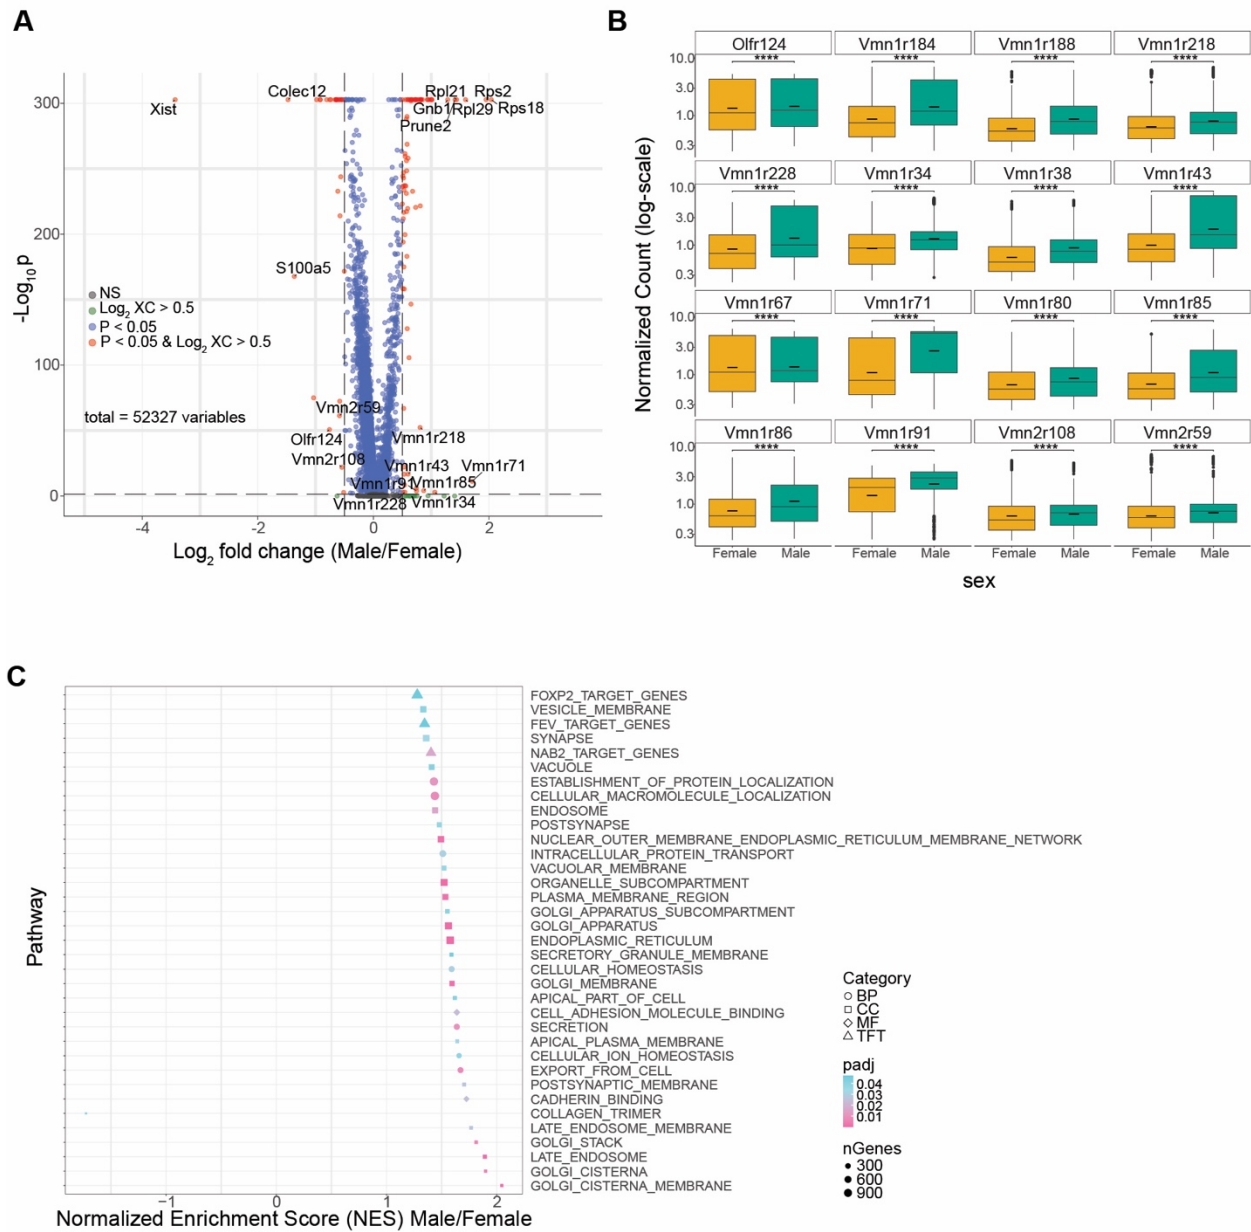

Fig. S2. Sex differences in gene expression.

**A** Volcano plot of gene expression differences between male and female mice. **B.** 16 significantly differentially expressed chemosensory receptors with largest positive or negative  $\log_2$ -fold-change values. **C.** 35 significantly enriched GO terms.

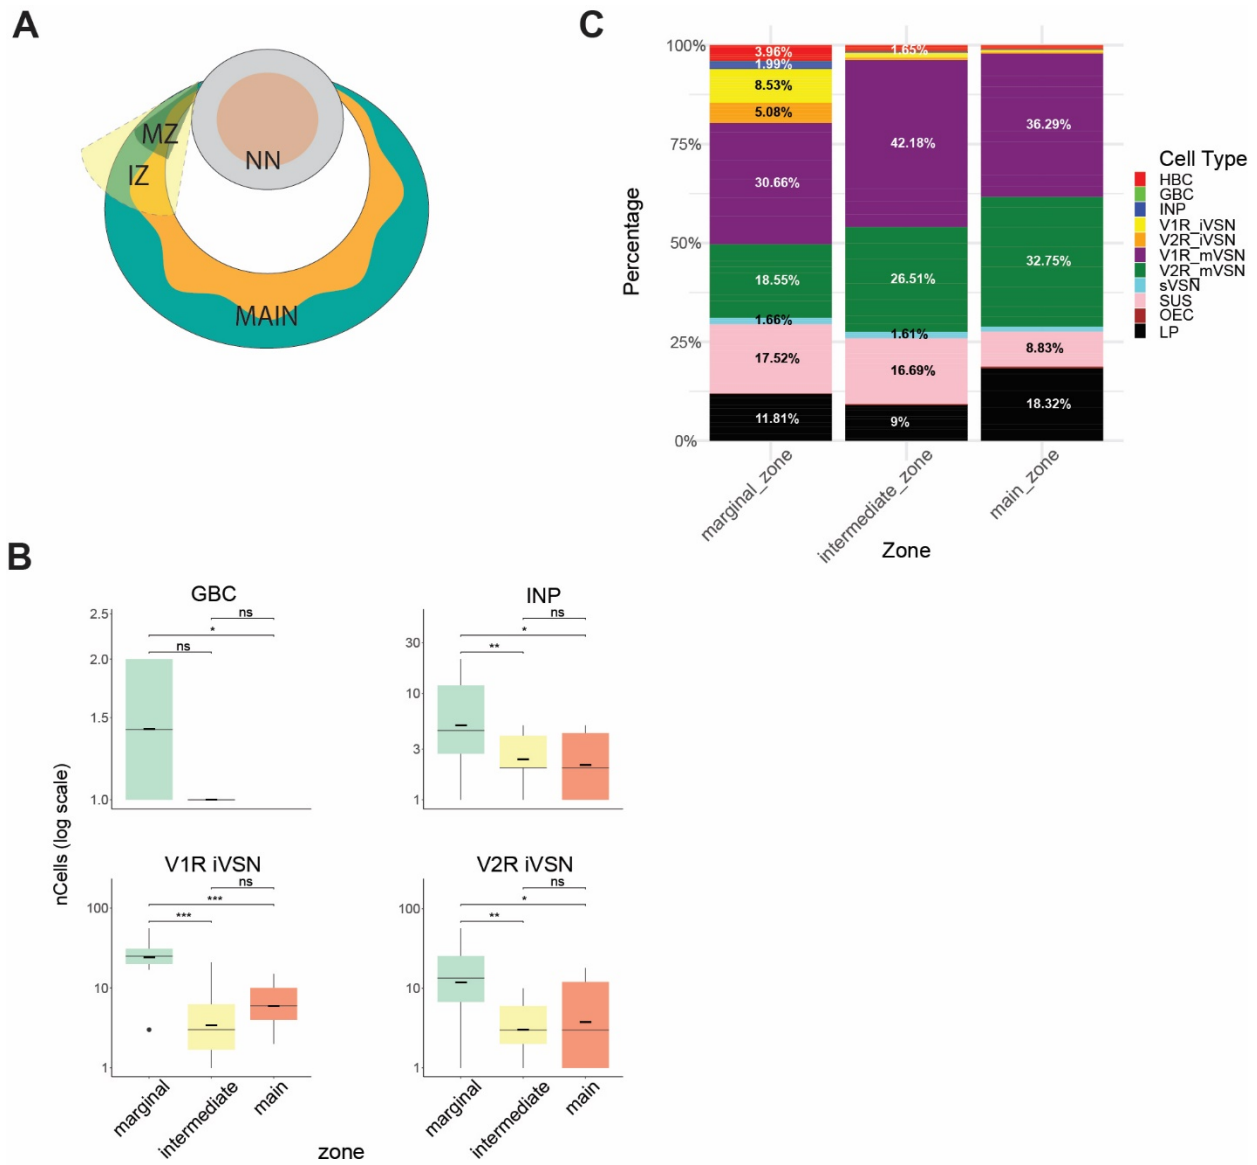

Fig. S3. Zonal distribution of cell types in the VNO neuroepithelia.

**A.** Schematic indicating quantification of cells in the marginal, intermediate, and main zones.

**B.** Stacked bar-plot of cell-type proportions by VNO zone. **C.** Box plots of GBC, INP, and immature VSN cell counts by zone, across 13 slides.

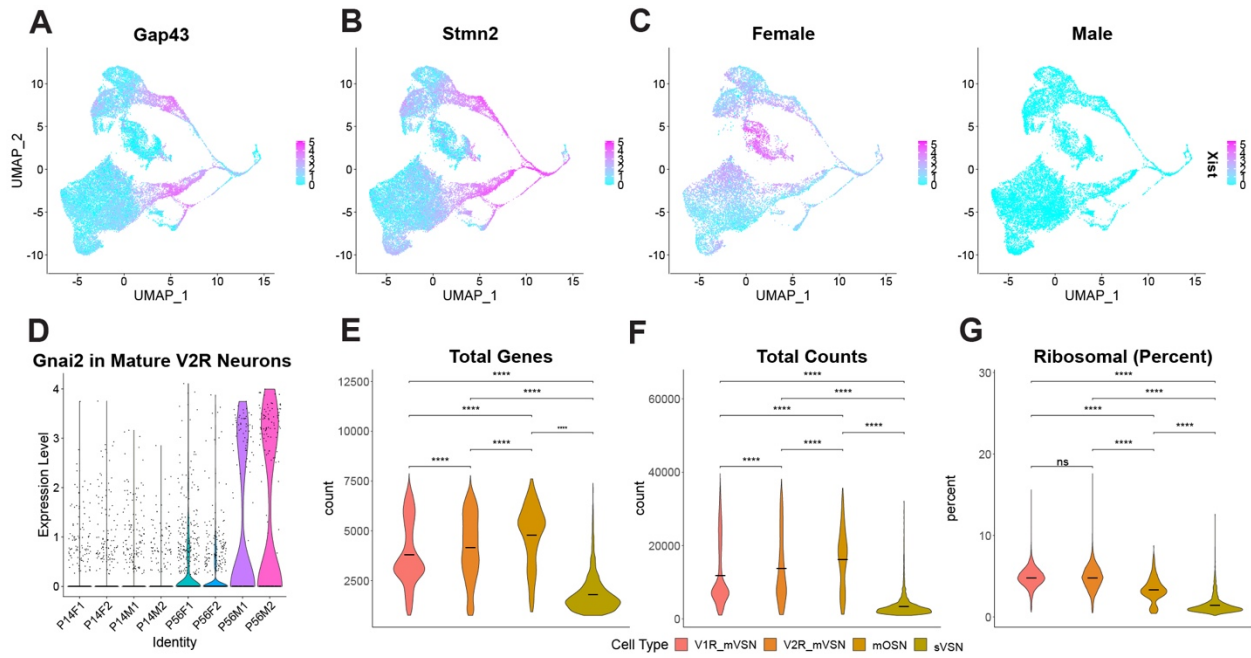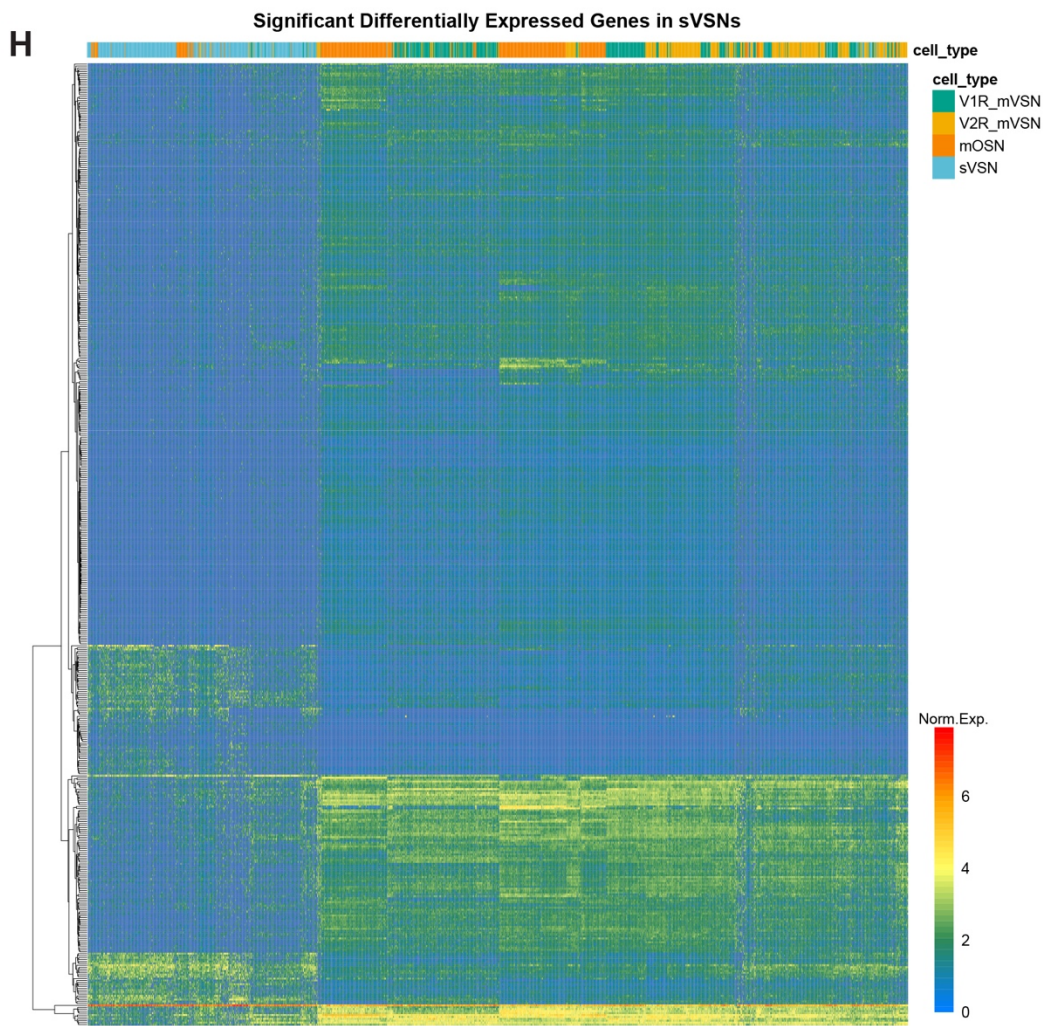

Fig. S4. Neuronal lineage features and differentially expressed genes in sVSNs.

**A.** and **B.** Normalized Gap43 and Stmn2 expression in the neuronal lineage. **C.** Normalized Xist expression in the neuronal lineage, split by sex. **D.** Violin plot of normalized Gnai2 expression in mature V2R neurons, split by sample. **E-G.** Total number of genes, counts, and percent ribosomal gene expression detected in mature neurons, split by cell type. **H.** Heatmap of 503 significant ( $p_{\text{adj}} \leq 0.001$ , fold-change  $\geq 1.5$ ) differentially expressed genes in sVSNs.



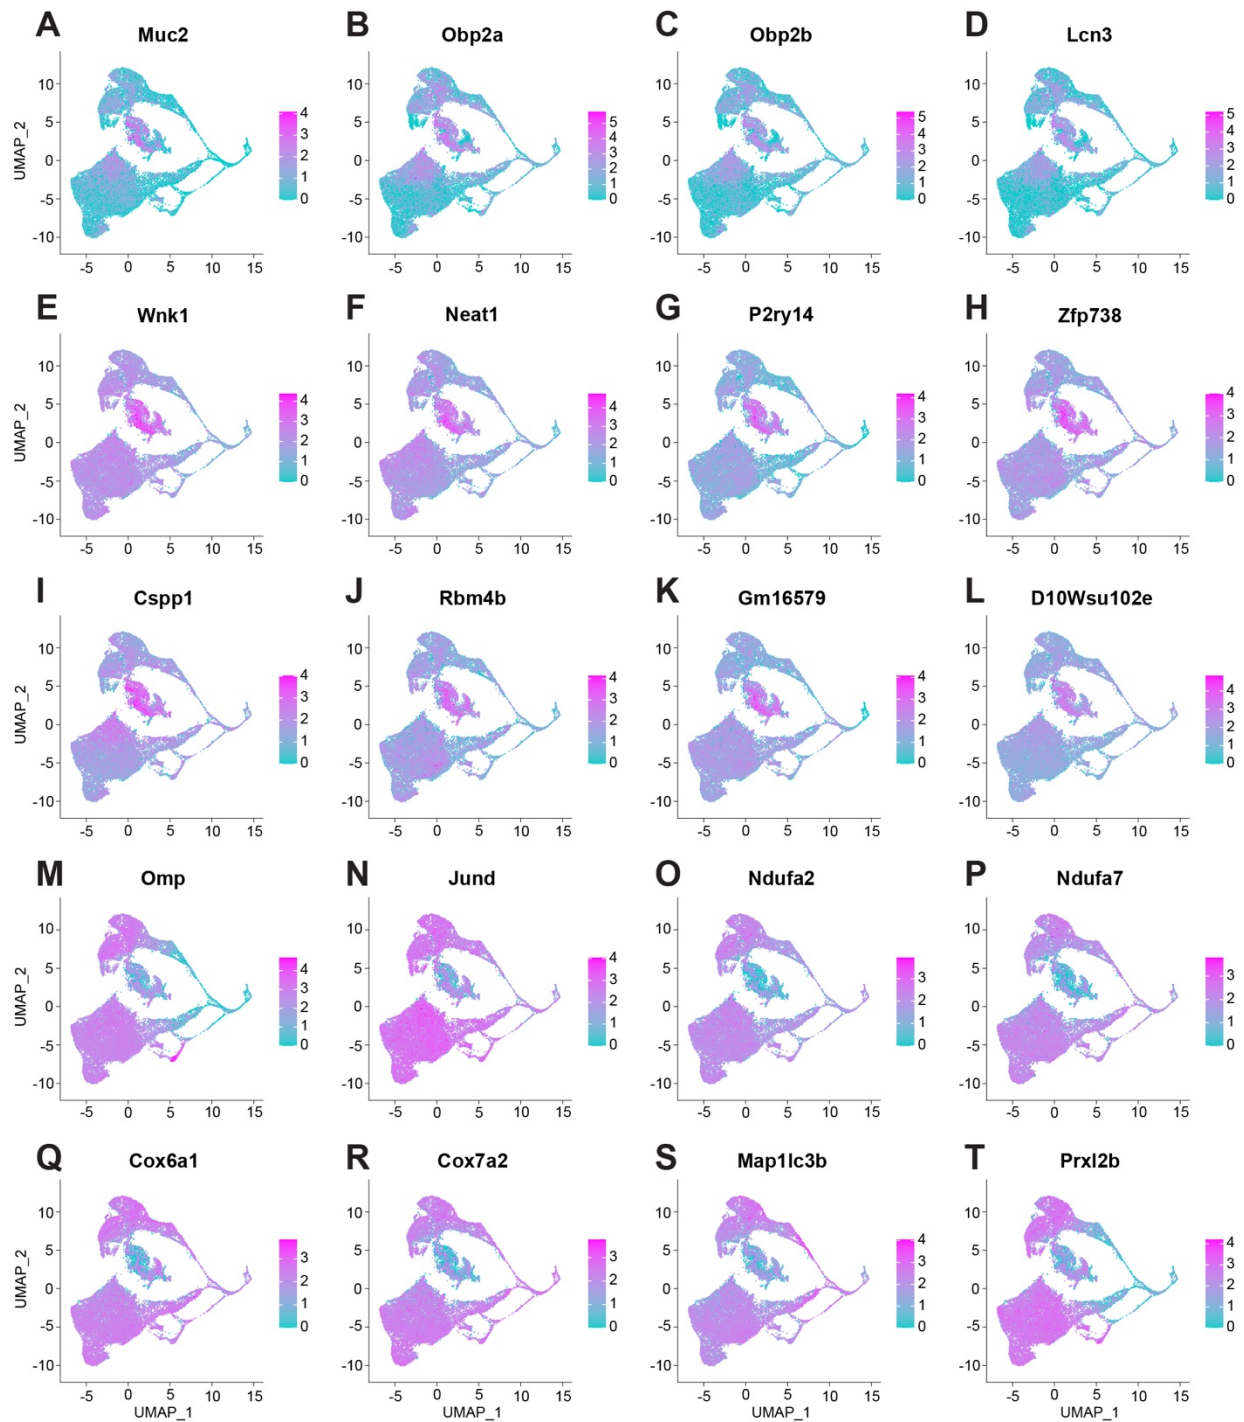

Fig. S5. Significantly regulated genes in sVSNs.

**A-D.** Feature plots showing odor binding protein gene expression (Muc2, Obp2a, Obp2b, and Lcn3).

**E-L.** Top upregulated genes in sVSNs. **M-T.** Top downregulated genes in sVSNs.



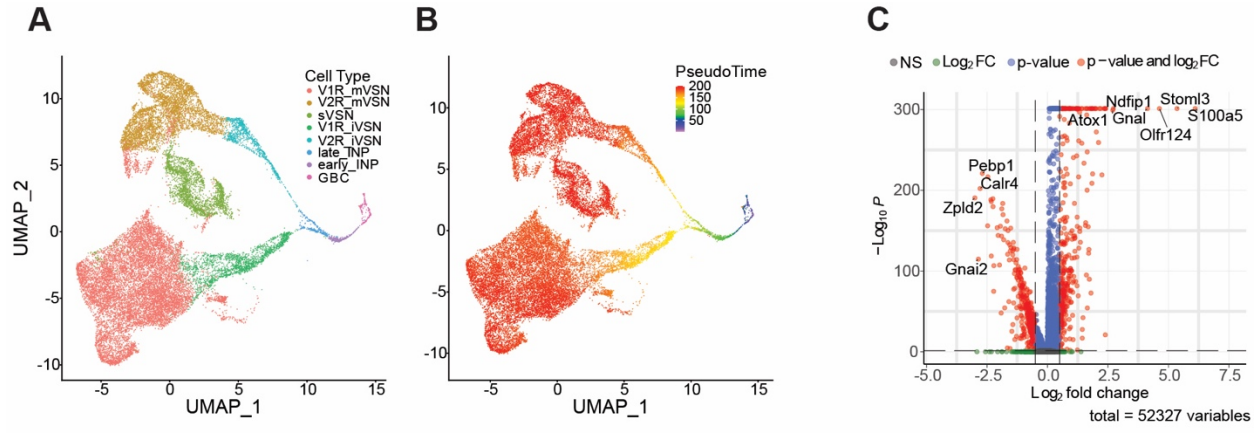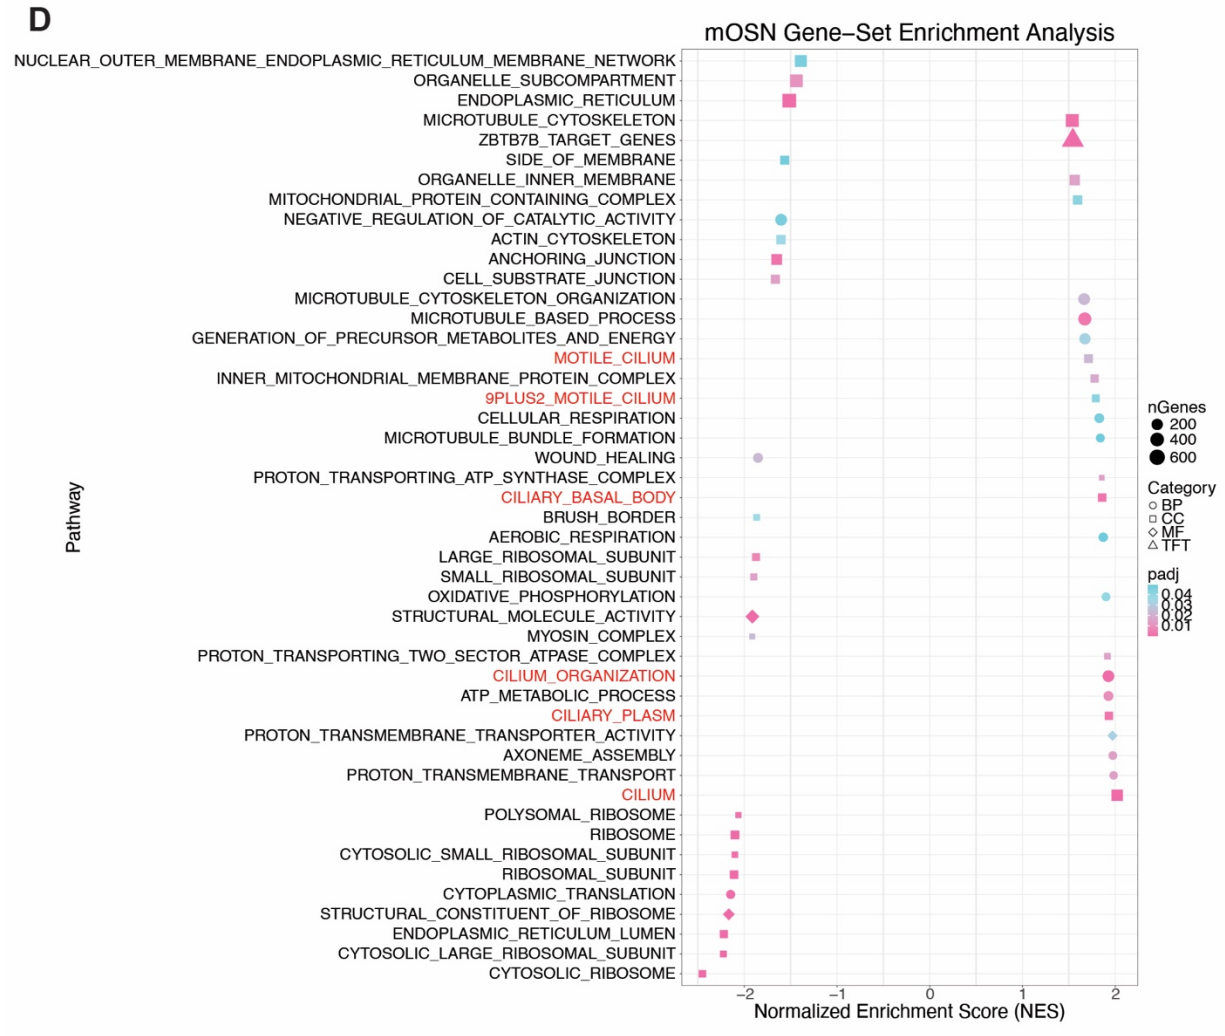

Fig. S6. sVSN Pseudotime, OSN markers and GO Terms.

**A.** VNO Neuronal lineage cell-types in UMAP space. **B.** V1R, V2R, and sVSN lineage pseudotimes in UMAP space. **C.** Volcano plot of mOSN gene expression versus all other cells from the neuronal lineage. **D.** 45 significant GO terms enriched in OSNs versus all other cells.

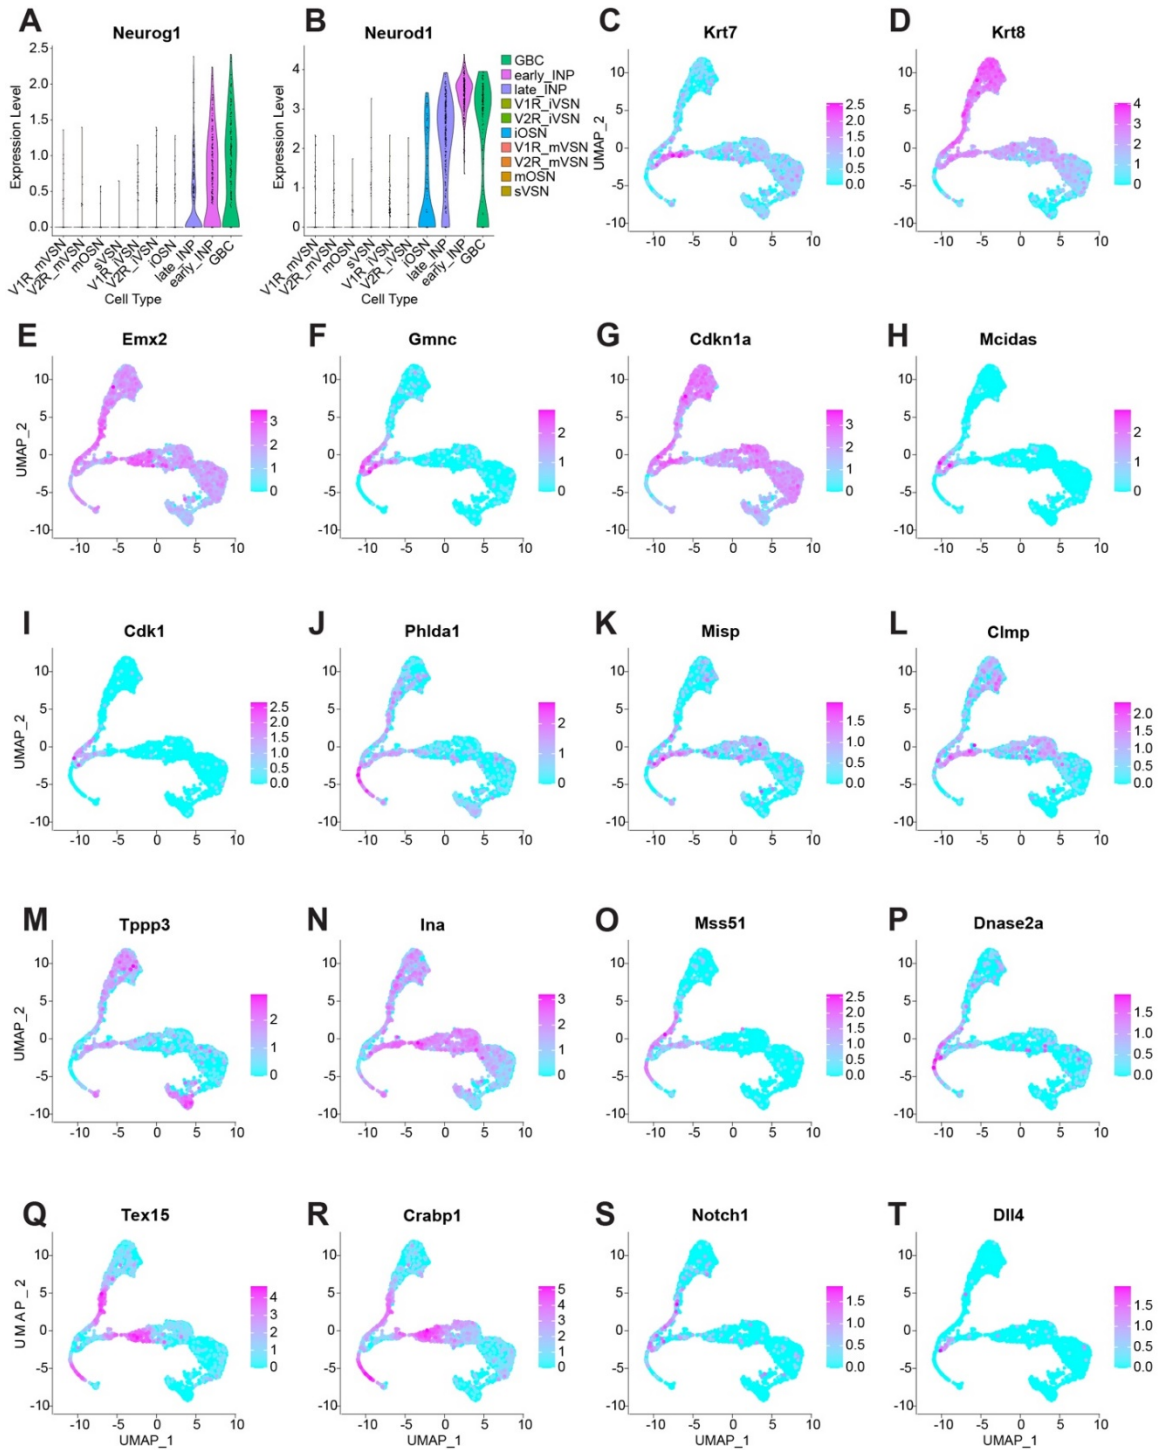

Fig. S7. Genes expressed during INP to immature neuron transition.

**A** and **B**. Violin plot of normalized expression for Neurog1 (**A**) and Neurod1 (**B**), split by cell type. **C-R**. Feature plots of normalized gene expression for early differentially expressed genes between V1R, V2R, and OSN lineages. **S** and **T**. Feature plots of normalized expression for Notch1 (**S**) and Dll4 (**T**).

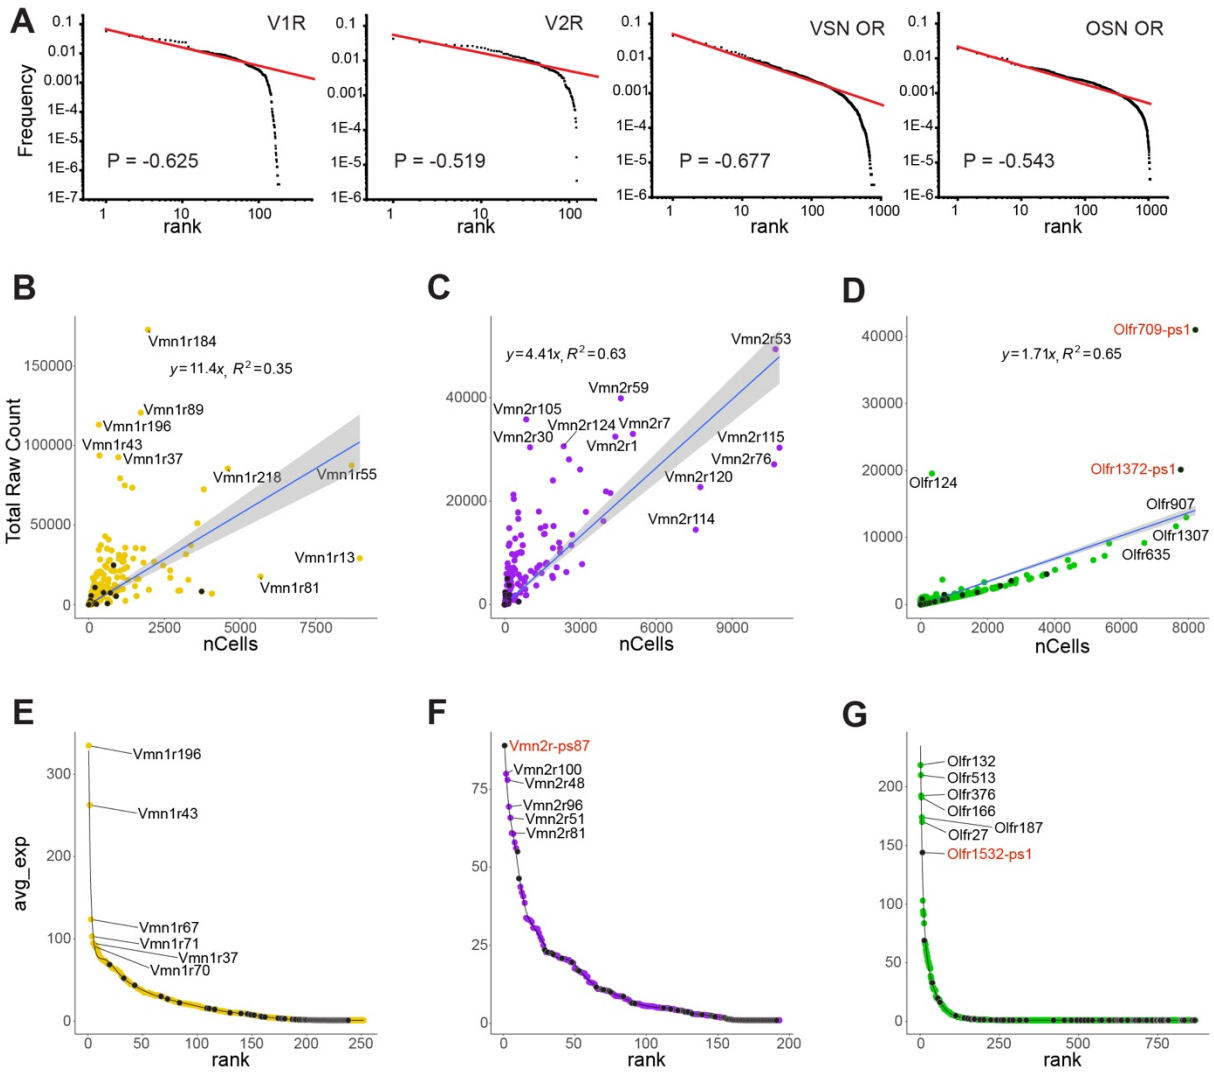

**Fig. S8. Receptor distribution in the VNO.**

**A.** Log scale rank-frequency distribution plots for V1R, V2R, VSN-OR, and OSN-OR. **B-D.** Number of cells expressing (nCells) vs. total raw counts for V1R, V2R, and VSN-OR. **E-F.** Rank by average count distributions for V1R, V2R, and VSN-OR.





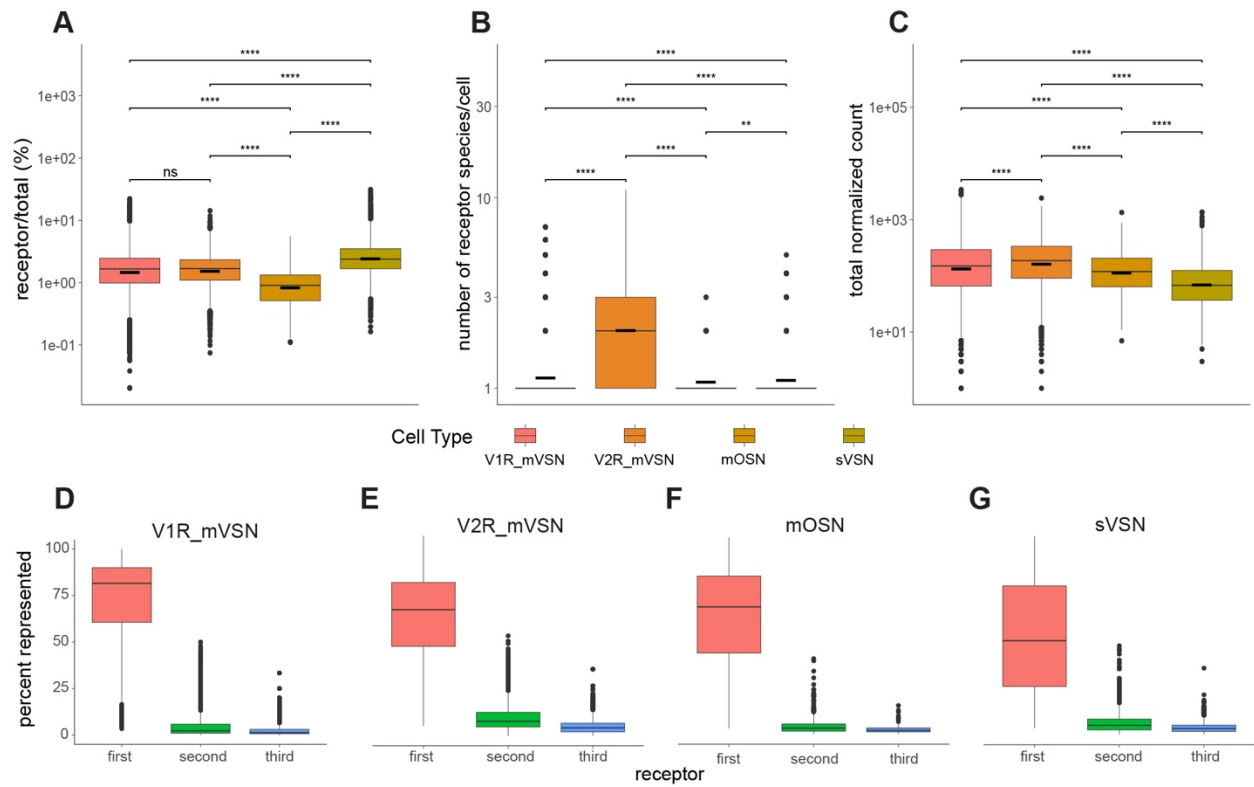

Fig. S10. Receptor expression statistics.

**A-C.** Percent of all read counts from a receptor gene (A), number of receptor species present per cell (B), and total counts from vomeronasal receptors (C), separated by cell type. **D-G.** Proportions of first, second, and third most expressed receptor gene as percent of total receptor counts, separated by cell type.
